# Supplementary material
Source: HighWire-hosted journal article supplement (https://jmg.bmj.com/content/59/5/481)
Supplement: inline-supplementary-material-1 [file inline-supplementary-material-1.pdf]

Supplementary Table 1: List of exclusion

|                                            | Case  | Control | Total  |
|--------------------------------------------|-------|---------|--------|
| Total samples sent for targeted sequencing | 8,205 | 8,227   | 16,432 |
| Male breast cancer                         | 2     | 0       | 2      |
| Relatives of proband                       | 12    | 0       | 12     |
| Duplicates                                 | 25    | 28      | 53     |
| Withdrawn or unavailable consent           | 8     | 0       | 8      |
| Incomplete or inconsistent data            | 3     | 26      | 29     |
| Failed sequencing QC                       | 315   | 245     | 560    |
| Final number of samples included           | 7,840 | 7,928   | 15,768 |
